# Supplementary material
Source: publisher figshare collection journal article supplement (https://acs.figshare.com/ndownloader/files/4284103)
Supplement: Supplementary file 1 [file 4284103]

 
data_Compound1
 
_audit_creation_method            SHELXL-97 
_chemical_name_systematic 
; 
 ? 
; 
_chemical_name_common             ? 
_chemical_melting_point           ? 
_chemical_formula_moiety          'C57 H44 N14 O4 Zn2, 2(N O3), 6(H2 O)' 
_chemical_formula_sum 
 'C57 H56 N16 O16 Zn2' 
_chemical_formula_weight          1351.92 
 
loop_ 
 _atom_type_symbol 
 _atom_type_description 
 _atom_type_scat_dispersion_real 
 _atom_type_scat_dispersion_imag 
 _atom_type_scat_source 
 'C'  'C'   0.0033   0.0016 
 'International Tables Vol C Tables 4.2.6.8 and 6.1.1.4' 
 'H'  'H'   0.0000   0.0000 
 'International Tables Vol C Tables 4.2.6.8 and 6.1.1.4' 
 'N'  'N'   0.0061   0.0033 
 'International Tables Vol C Tables 4.2.6.8 and 6.1.1.4' 
 'O'  'O'   0.0106   0.0060 
 'International Tables Vol C Tables 4.2.6.8 and 6.1.1.4' 
 'Zn'  'Zn'   0.2839   1.4301 
 'International Tables Vol C Tables 4.2.6.8 and 6.1.1.4' 
 
_symmetry_cell_setting            Orthorhombic 
_symmetry_space_group_name_H-M    pnna 
_symmetry_space_group_name_Hall  '-P 2a 2bc'
 
loop_ 
 _symmetry_equiv_pos_as_xyz 
 'x, y, z' 
 '-x+1/2, -y, z' 
 'x, -y+1/2, -z+1/2' 
 '-x+1/2, y+1/2, -z+1/2' 
 '-x, -y, -z' 
 'x-1/2, y, -z' 
 '-x, y-1/2, z-1/2' 
 'x-1/2, -y-1/2, z-1/2' 
 
_cell_length_a                    28.330(3) 
_cell_length_b                    27.766(3) 
_cell_length_c                    9.9055(11) 
_cell_angle_alpha                 90.00 
_cell_angle_beta                  90.00 
_cell_angle_gamma                 90.00 
_cell_volume                      7791.8(15) 
_cell_formula_units_Z             4 
_cell_measurement_temperature     291(2) 
_cell_measurement_reflns_used     5353 
_cell_measurement_theta_min       2.30 
_cell_measurement_theta_max       22.105 
 
_exptl_crystal_description        ? 
_exptl_crystal_colour             ? 
_exptl_crystal_size_max           0.32 
_exptl_crystal_size_mid           0.28 
_exptl_crystal_size_min           0.28 
_exptl_crystal_density_meas       ? 
_exptl_crystal_density_diffrn     1.152 
_exptl_crystal_density_method     'not measured' 
_exptl_crystal_F_000              2792 
_exptl_absorpt_coefficient_mu     0.680 
_exptl_absorpt_correction_type    'Multi-scan'
_exptl_absorpt_correction_T_min   0.8118 
_exptl_absorpt_correction_T_max   0.8324 
_exptl_absorpt_process_details    'SADABS; Bruker, 2000' 
 
_exptl_special_details 
; 
 ? 
; 
 
_diffrn_ambient_temperature       291(2) 
_diffrn_radiation_wavelength      0.71073 
_diffrn_radiation_type            MoK\a 
_diffrn_radiation_source          'fine-focus sealed tube' 
_diffrn_radiation_monochromator   graphite 
_diffrn_measurement_device_type   ? 
_diffrn_measurement_method        ? 
_diffrn_detector_area_resol_mean  ? 
_diffrn_standards_number          ? 
_diffrn_standards_interval_count  ? 
_diffrn_standards_interval_time   ? 
_diffrn_standards_decay_%         ? 
_diffrn_reflns_number             40500 
_diffrn_reflns_av_R_equivalents   0.0756 
_diffrn_reflns_av_sigmaI/netI     0.0788 
_diffrn_reflns_limit_h_min        -20 
_diffrn_reflns_limit_h_max        34 
_diffrn_reflns_limit_k_min        -34 
_diffrn_reflns_limit_k_max        33 
_diffrn_reflns_limit_l_min        -12 
_diffrn_reflns_limit_l_max        12 
_diffrn_reflns_theta_min          1.61 
_diffrn_reflns_theta_max          26.00 
_reflns_number_total              7664 
_reflns_number_gt                 4838 
_reflns_threshold_expression      >2sigma(I) 
 
_computing_data_collection        ? 
_computing_cell_refinement        ? 
_computing_data_reduction         ? 
_computing_structure_solution     'SHELXS-97 (Sheldrick, 1990)' 
_computing_structure_refinement   'SHELXL-97 (Sheldrick, 1997)' 
_computing_molecular_graphics     ? 
_computing_publication_material   ? 
 
_refine_special_details 
; 
 Refinement of F^2^ against ALL reflections.  The weighted R-factor wR and 
 goodness of fit S are based on F^2^, conventional R-factors R are based 
 on F, with F set to zero for negative F^2^. The threshold expression of 
 F^2^ > 2sigma(F^2^) is used only for calculating R-factors(gt) etc. and is 
 not relevant to the choice of reflections for refinement.  R-factors based 
 on F^2^ are statistically about twice as large as those based on F, and R- 
 factors based on ALL data will be even larger. 
; 
 
_refine_ls_structure_factor_coef  Fsqd  
_refine_ls_matrix_type            full 
_refine_ls_weighting_scheme       calc  
_refine_ls_weighting_details 
 'calc w=1/[\s^2^(Fo^2^)+(0.0400P)^2^+0.0000P] where P=(Fo^2^+2Fc^2^)/3' 
_atom_sites_solution_primary      direct 
_atom_sites_solution_secondary    difmap 
_atom_sites_solution_hydrogens    geom 
_refine_ls_hydrogen_treatment     constr 
_refine_ls_extinction_method      none 
_refine_ls_extinction_coef        ? 
_refine_ls_number_reflns          7664 
_refine_ls_number_parameters      444 
_refine_ls_number_restraints      0 
_refine_ls_R_factor_all           0.0797 
_refine_ls_R_factor_gt            0.0506 
_refine_ls_wR_factor_ref          0.1000 
_refine_ls_wR_factor_gt           0.0959 
_refine_ls_goodness_of_fit_ref    1.007 
_refine_ls_restrained_S_all       1.007 
_refine_ls_shift/su_max           0.000 
_refine_ls_shift/su_mean          0.000 
 
loop_ 
 _atom_site_label 
 _atom_site_type_symbol 
 _atom_site_fract_x 
 _atom_site_fract_y 
 _atom_site_fract_z 
 _atom_site_U_iso_or_equiv 
 _atom_site_adp_type 
 _atom_site_occupancy 
 _atom_site_symmetry_multiplicity 
 _atom_site_calc_flag 
 _atom_site_refinement_flags 
 _atom_site_disorder_assembly 
 _atom_site_disorder_group 
C1 C 0.43354(10) 0.55505(10) 0.5412(3) 0.0422(6) Uani 1 1 d . . . 
H1 H 0.4139 0.5562 0.6163 0.051 Uiso 1 1 calc R . . 
C2 C 0.47086(10) 0.58070(10) 0.5271(3) 0.0421(6) Uani 1 1 d . . . 
H2 H 0.4832 0.6024 0.5895 0.051 Uiso 1 1 calc R . . 
C3 C 0.46028(9) 0.53744(10) 0.3493(3) 0.0415(6) Uani 1 1 d . . . 
H3 H 0.4636 0.5243 0.2635 0.050 Uiso 1 1 calc R . . 
C4 C 0.42359(9) 0.40249(9) 0.2749(2) 0.0388(6) Uani 1 1 d . . . 
H4 H 0.4419 0.4215 0.2181 0.047 Uiso 1 1 calc R . . 
C5 C 0.42859(9) 0.35471(10) 0.2902(2) 0.0391(6) Uani 1 1 d . . . 
H5 H 0.4507 0.3350 0.2481 0.047 Uiso 1 1 calc R . . 
C6 C 0.37053(9) 0.38248(9) 0.4198(3) 0.0402(6) Uani 1 1 d . . . 
H6 H 0.3461 0.3843 0.4823 0.048 Uiso 1 1 calc R . . 
C7 C 0.30071(9) 0.53952(9) 0.2061(3) 0.0414(6) Uani 1 1 d . . . 
H7 H 0.2805 0.5456 0.2782 0.050 Uiso 1 1 calc R . . 
C8 C 0.35989(9) 0.51499(10) 0.0895(2) 0.0440(6) Uani 1 1 d . . . 
H8 H 0.3884 0.5007 0.0656 0.053 Uiso 1 1 calc R . . 
C9 C 0.33124(9) 0.53892(10) 0.0011(3) 0.0431(6) Uani 1 1 d . . . 
H9 H 0.3361 0.5440 -0.0907 0.052 Uiso 1 1 calc R . . 
C10 C 0.52884(5) 0.59142(5) 0.33492(16) 0.0399(6) Uani 1 1 d G . . 
C11 C 0.53483(5) 0.64106(5) 0.34086(15) 0.0390(6) Uani 1 1 d G . . 
H11 H 0.5145 0.6597 0.3928 0.047 Uiso 1 1 calc R . . 
C12 C 0.57121(6) 0.66283(4) 0.26915(16) 0.0415(6) Uani 1 1 d G . . 
H12 H 0.5752 0.6960 0.2731 0.050 Uiso 1 1 calc R . . 
C13 C 0.60160(5) 0.63495(5) 0.19148(16) 0.0386(6) Uani 1 1 d G . . 
C14 C 0.59561(5) 0.58531(5) 0.18554(16) 0.0422(6) Uani 1 1 d G . . 
H14 H 0.6159 0.5667 0.1336 0.051 Uiso 1 1 calc R . . 
C15 C 0.55923(6) 0.56354(4) 0.25726(17) 0.0415(6) Uani 1 1 d G . . 
H15 H 0.5552 0.5303 0.2533 0.050 Uiso 1 1 calc R . . 
C16 C 0.38630(9) 0.29315(9) 0.4352(2) 0.0378(6) Uani 1 1 d . . . 
C17 C 0.42205(9) 0.26203(10) 0.4397(2) 0.0387(6) Uani 1 1 d . . . 
H17 H 0.4512 0.2701 0.4027 0.046 Uiso 1 1 calc R . . 
C18 C 0.41547(9) 0.21685(9) 0.5009(2) 0.0393(6) Uani 1 1 d . . . 
H18 H 0.4406 0.1954 0.5064 0.047 Uiso 1 1 calc R . . 
C19 C 0.37204(9) 0.20400(10) 0.5528(2) 0.0410(6) Uani 1 1 d . . . 
C20 C 0.33465(9) 0.23659(9) 0.5435(2) 0.0401(6) Uani 1 1 d . . . 
H20 H 0.3048 0.2276 0.5730 0.048 Uiso 1 1 calc R . . 
C21 C 0.34182(9) 0.28227(9) 0.4908(2) 0.0400(6) Uani 1 1 d . . . 
H21 H 0.3178 0.3051 0.4921 0.048 Uiso 1 1 calc R . . 
C22 C 0.25286(9) 0.58057(10) 0.0329(3) 0.0408(6) Uani 1 1 d . . . 
C23 C 0.22195(9) 0.59918(10) 0.1214(3) 0.0450(7) Uani 1 1 d . . . 
H23 H 0.2260 0.5957 0.2141 0.054 Uiso 1 1 calc R . . 
C24 C 0.18349(9) 0.62401(10) 0.0674(2) 0.0411(6) Uani 1 1 d . . . 
H24 H 0.1613 0.6361 0.1276 0.049 Uiso 1 1 calc R . . 
C25 C 0.17622(9) 0.63165(9) -0.0623(2) 0.0391(6) Uani 1 1 d . . . 
C26 C 0.20681(10) 0.61218(10) -0.1444(3) 0.0440(6) Uani 1 1 d . . . 
H26 H 0.2004 0.6136 -0.2364 0.053 Uiso 1 1 calc R . . 
C27 C 0.24693(10) 0.59017(10) -0.1058(3) 0.0447(6) Uani 1 1 d . . . 
H27 H 0.2699 0.5816 -0.1684 0.054 Uiso 1 1 calc R . . 
C28 C 0.29047(11) 0.48706(11) 0.5294(3) 0.0459(7) Uani 1 1 d . . . 
C29 C 0.2500 0.5000 0.6217(4) 0.0421(8) Uani 1 2 d S . . 
H29A H 0.2583 0.5271 0.6787 0.050 Uiso 0.50 1 calc PR . . 
H29B H 0.2417 0.4729 0.6787 0.050 Uiso 0.50 1 calc PR . . 
N1 N 0.42626(8) 0.52565(8) 0.4311(2) 0.0407(5) Uani 1 1 d . . . 
N2 N 0.48962(8) 0.56980(8) 0.3992(2) 0.0396(5) Uani 1 1 d . . . 
N3 N 0.63695(8) 0.65863(8) 0.11201(19) 0.0414(5) Uani 1 1 d . . . 
N4 N 0.38791(7) 0.41927(8) 0.3544(2) 0.0385(5) Uani 1 1 d . . . 
N5 N 0.39344(7) 0.34053(8) 0.38336(19) 0.0383(5) Uani 1 1 d . . . 
N6 N 0.34225(8) 0.51463(8) 0.2136(2) 0.0425(5) Uani 1 1 d . . . 
N7 N 0.29366(8) 0.55381(8) 0.0784(2) 0.0398(5) Uani 1 1 d . . . 
N8 N 0.55520(9) 0.33105(10) 0.1540(2) 0.0537(6) Uani 1 1 d . . . 
O1 O 0.28591(7) 0.45497(7) 0.44265(18) 0.0458(5) Uani 1 1 d . . . 
O2 O 0.32531(8) 0.50334(7) 0.55069(19) 0.0473(5) Uani 1 1 d . . . 
O3 O 0.53632(8) 0.36502(8) 0.0936(2) 0.0595(6) Uani 1 1 d . . . 
O4 O 0.59777(7) 0.32533(7) 0.14403(18) 0.0533(5) Uani 1 1 d . . . 
O5 O 0.53118(7) 0.30125(7) 0.21143(19) 0.0536(5) Uani 1 1 d . . . 
O1W O 0.52226(16) 0.98772(16) 0.5594(4) 0.0415(10) Uani 0.40 1 d P . . 
H1WA H 0.5249 1.0055 0.4900 0.050 Uiso 0.40 1 d PR . . 
H1WD H 0.5161 0.9578 0.5581 0.050 Uiso 0.40 1 d PR . . 
O2W O 0.92226(19) 0.81324(18) 0.9778(5) 0.0572(13) Uani 0.40 1 d P . . 
H2WA H 0.9414 0.8362 0.9929 0.086 Uiso 0.40 1 d PR . . 
H2WC H 0.9337 0.7947 0.9177 0.086 Uiso 0.40 1 d PR . . 
O3W O 0.23794(16) 0.28140(18) 0.6736(5) 0.0523(12) Uani 0.40 1 d P . . 
H3WB H 0.2155 0.2907 0.7243 0.078 Uiso 0.40 1 d PR . . 
H3WC H 0.2291 0.2824 0.5916 0.078 Uiso 0.40 1 d PR . . 
O4W O 0.16289(18) 0.38863(19) 0.5650(5) 0.0550(13) Uani 0.40 1 d P . . 
H4WB H 0.1617 0.4092 0.6285 0.066 Uiso 0.40 1 d PR . . 
H4WC H 0.1747 0.4016 0.4950 0.066 Uiso 0.40 1 d PR . . 
O5W O 0.27815(18) 0.79482(19) 0.2081(4) 0.0553(13) Uani 0.40 1 d P . . 
H5WD H 0.2955 0.7703 0.2216 0.066 Uiso 0.40 1 d PR . . 
H5WC H 0.2924 0.8144 0.1562 0.083 Uiso 0.40 1 d PR . . 
O6W O 0.2890(2) 0.8136(3) 0.4420(7) 0.0597(19) Uani 0.30 1 d P . . 
H6WA H 0.2977 0.8426 0.4308 0.072 Uiso 0.30 1 d PR . . 
H6WB H 0.2632 0.8130 0.4855 0.072 Uiso 0.30 1 d PR . . 
O7W O 0.5536(2) 0.2893(2) 0.8479(6) 0.0566(18) Uani 0.30 1 d P . . 
H7WA H 0.5630 0.2905 0.9293 0.068 Uiso 0.30 1 d PR . . 
H7WC H 0.5770 0.2847 0.7960 0.068 Uiso 0.30 1 d PR . . 
O8W O 0.61234(18) 0.13913(18) 0.6645(4) 0.0527(12) Uani 0.40 1 d P . . 
H8WB H 0.5907 0.1180 0.6592 0.063 Uiso 0.40 1 d PR . . 
H8WC H 0.6324 0.1346 0.6019 0.063 Uiso 0.40 1 d PR . . 
Zn1 Zn 0.368504(11) 0.487442(11) 0.38402(3) 0.04308(10) Uani 1 1 d . . . 
 
loop_ 
 _atom_site_aniso_label 
 _atom_site_aniso_U_11 
 _atom_site_aniso_U_22 
 _atom_site_aniso_U_33 
 _atom_site_aniso_U_23 
 _atom_site_aniso_U_13 
 _atom_site_aniso_U_12 
C1 0.0422(16) 0.0443(16) 0.0402(14) 0.0111(11) 0.0093(11) 0.0088(13) 
C2 0.0382(15) 0.0462(16) 0.0419(14) 0.0040(11) 0.0091(11) 0.0047(12) 
C3 0.0390(14) 0.0391(15) 0.0466(14) 0.0074(11) 0.0080(11) 0.0097(13) 
C4 0.0419(15) 0.0336(14) 0.0409(13) 0.0065(11) 0.0071(11) 0.0052(11) 
C5 0.0365(14) 0.0403(15) 0.0405(13) 0.0079(11) 0.0081(11) 0.0123(11) 
C6 0.0418(15) 0.0295(13) 0.0493(13) 0.0104(10) 0.0091(12) 0.0043(12) 
C7 0.0397(15) 0.0390(15) 0.0455(13) 0.0084(11) 0.0080(11) 0.0098(12) 
C8 0.0343(14) 0.0517(17) 0.0458(14) 0.0101(12) 0.0041(11) 0.0104(12) 
C9 0.0389(15) 0.0462(16) 0.0442(13) 0.0096(12) 0.0062(11) 0.0118(12) 
C10 0.0406(15) 0.0345(14) 0.0445(13) 0.0076(11) 0.0056(11) 0.0039(11) 
C11 0.0384(15) 0.0383(14) 0.0402(12) 0.0060(11) 0.0091(11) 0.0090(11) 
C12 0.0443(15) 0.0378(15) 0.0425(13) 0.0096(11) 0.0118(11) 0.0081(12) 
C13 0.0350(14) 0.0355(15) 0.0455(13) 0.0088(11) 0.0100(11) 0.0076(11) 
C14 0.0402(15) 0.0370(15) 0.0495(14) 0.0062(11) 0.0106(12) 0.0099(12) 
C15 0.0412(15) 0.0325(14) 0.0507(14) 0.0075(11) 0.0112(12) 0.0034(11) 
C16 0.0368(13) 0.0358(15) 0.0408(12) 0.0065(10) 0.0047(10) 0.0056(12) 
C17 0.0340(13) 0.0393(15) 0.0428(13) 0.0070(11) 0.0083(11) 0.0055(11) 
C18 0.0409(15) 0.0320(14) 0.0450(14) 0.0053(11) 0.0112(11) 0.0101(11) 
C19 0.0422(15) 0.0361(15) 0.0448(13) 0.0081(11) 0.0080(12) 0.0099(12) 
C20 0.0349(14) 0.0356(14) 0.0499(14) 0.0122(11) 0.0109(11) 0.0085(11) 
C21 0.0375(14) 0.0343(14) 0.0484(14) 0.0137(11) 0.0070(12) 0.0074(11) 
C22 0.0367(14) 0.0387(15) 0.0470(13) 0.0091(12) 0.0069(11) 0.0101(12) 
C23 0.0438(16) 0.0477(16) 0.0435(14) 0.0105(12) 0.0145(12) 0.0113(12) 
C24 0.0399(15) 0.0407(15) 0.0426(13) 0.0084(11) 0.0118(11) 0.0078(12) 
C25 0.0358(13) 0.0362(14) 0.0453(13) 0.0100(11) 0.0092(11) 0.0086(11) 
C26 0.0426(15) 0.0495(16) 0.0400(13) 0.0042(11) 0.0073(11) 0.0157(13) 
C27 0.0433(16) 0.0446(16) 0.0461(14) 0.0069(12) 0.0130(12) 0.0143(12) 
C28 0.0449(18) 0.0447(17) 0.0483(16) 0.0138(13) 0.0098(12) 0.0071(15) 
C29 0.039(2) 0.043(2) 0.0443(19) 0.000 0.000 0.0094(16) 
N1 0.0376(12) 0.0387(13) 0.0458(11) 0.0097(9) 0.0092(9) 0.0048(9) 
N2 0.0381(12) 0.0381(12) 0.0427(11) 0.0093(9) 0.0087(9) 0.0074(10) 
N3 0.0420(12) 0.0395(12) 0.0428(11) 0.0115(10) 0.0124(10) 0.0095(10) 
N4 0.0344(12) 0.0381(12) 0.0430(10) 0.0081(9) 0.0073(9) 0.0085(10) 
N5 0.0381(12) 0.0355(12) 0.0414(11) 0.0078(9) 0.0071(9) 0.0053(9) 
N6 0.0372(11) 0.0423(13) 0.0480(12) 0.0100(10) 0.0095(10) 0.0096(10) 
N7 0.0410(13) 0.0354(12) 0.0429(11) 0.0068(9) 0.0085(10) 0.0083(10) 
N8 0.0498(16) 0.0591(17) 0.0521(13) 0.0121(12) 0.0087(12) 0.0164(13) 
O1 0.0475(12) 0.0444(12) 0.0455(10) 0.0097(9) 0.0083(9) 0.0104(9) 
O2 0.0441(12) 0.0475(12) 0.0503(10) 0.0111(9) 0.0066(9) 0.0063(10) 
O3 0.0551(13) 0.0630(14) 0.0604(11) 0.0203(10) 0.0076(10) 0.0083(11) 
O4 0.0525(12) 0.0541(13) 0.0533(10) 0.0112(9) 0.0100(9) 0.0077(10) 
O5 0.0523(12) 0.0541(12) 0.0545(11) 0.0090(10) 0.0152(9) 0.0124(10) 
O1W 0.050(3) 0.037(3) 0.038(2) 0.0037(19) 0.008(2) 0.002(2) 
O2W 0.064(3) 0.047(3) 0.061(3) 0.006(2) 0.015(2) 0.008(2) 
O3W 0.048(3) 0.066(3) 0.044(2) 0.009(2) 0.015(2) 0.014(3) 
O4W 0.060(3) 0.060(3) 0.045(2) 0.006(2) 0.009(2) 0.011(3) 
O5W 0.066(3) 0.052(3) 0.048(3) 0.000(2) 0.009(2) 0.015(3) 
O6W 0.048(4) 0.066(5) 0.065(4) 0.018(3) 0.029(3) 0.017(4) 
O7W 0.059(4) 0.056(4) 0.055(4) 0.017(3) 0.020(3) 0.015(3) 
O8W 0.062(3) 0.047(3) 0.049(2) 0.012(2) 0.005(2) 0.014(2) 
Zn1 0.04018(18) 0.03869(18) 0.05037(17) 0.00861(13) 0.00924(13) 0.00786(14) 
 
_geom_special_details 
; 
 All esds (except the esd in the dihedral angle between two l.s. planes) 
 are estimated using the full covariance matrix.  The cell esds are taken 
 into account individually in the estimation of esds in distances, angles 
 and torsion angles; correlations between esds in cell parameters are only 
 used when they are defined by crystal symmetry.  An approximate (isotropic) 
 treatment of cell esds is used for estimating esds involving l.s. planes. 
; 
 
loop_ 
 _geom_bond_atom_site_label_1 
 _geom_bond_atom_site_label_2 
 _geom_bond_distance 
 _geom_bond_site_symmetry_2 
 _geom_bond_publ_flag 
C1 C2 1.282(4) . ? 
C1 N1 1.378(3) . ? 
C1 H1 0.9300 . ? 
C2 N2 1.407(3) . ? 
C2 H2 0.9300 . ? 
C3 N1 1.301(3) . ? 
C3 N2 1.320(4) . ? 
C3 H3 0.9300 . ? 
C4 C5 1.343(4) . ? 
C4 N4 1.363(3) . ? 
C4 H4 0.9300 . ? 
C5 N5 1.414(3) . ? 
C5 H5 0.9300 . ? 
C6 N4 1.306(3) . ? 
C6 N5 1.381(3) . ? 
C6 H6 0.9300 . ? 
C7 N7 1.341(3) . ? 
C7 N6 1.367(3) . ? 
C7 H7 0.9300 . ? 
C8 N6 1.327(3) . ? 
C8 C9 1.367(3) . ? 
C8 H8 0.9300 . ? 
C9 N7 1.375(3) . ? 
C9 H9 0.9300 . ? 
C10 C11 1.3900 . ? 
C10 C15 1.3900 . ? 
C10 N2 1.414(2) . ? 
C11 C12 1.3900 . ? 
C11 H11 0.9300 . ? 
C12 C13 1.3900 . ? 
C12 H12 0.9300 . ? 
C13 C14 1.3900 . ? 
C13 N3 1.434(2) . ? 
C14 C15 1.3900 . ? 
C14 H14 0.9300 . ? 
C15 H15 0.9300 . ? 
C16 C17 1.332(3) . ? 
C16 C21 1.408(3) . ? 
C16 N5 1.426(3) . ? 
C17 C18 1.406(3) . ? 
C17 H17 0.9300 . ? 
C18 C19 1.380(4) . ? 
C18 H18 0.9300 . ? 
C19 C20 1.396(3) . ? 
C19 N3 1.413(3) 7_656 ? 
C20 C21 1.387(3) . ? 
C20 H20 0.9300 . ? 
C21 H21 0.9300 . ? 
C22 C23 1.342(3) . ? 
C22 C27 1.410(4) . ? 
C22 N7 1.446(3) . ? 
C23 C24 1.396(4) . ? 
C23 H23 0.9300 . ? 
C24 C25 1.318(3) . ? 
C24 H24 0.9300 . ? 
C25 C26 1.305(3) . ? 
C25 N3 1.429(3) 6 ? 
C26 C27 1.346(4) . ? 
C26 H26 0.9300 . ? 
C27 H27 0.9300 . ? 
C28 O2 1.106(3) . ? 
C28 O1 1.245(4) . ? 
C28 C29 1.510(3) . ? 
C29 C28 1.510(3) 2_565 ? 
C29 H29A 0.9700 . ? 
C29 H29B 0.9700 . ? 
N1 Zn1 2.005(2) . ? 
N3 C19 1.413(3) 7_665 ? 
N3 C25 1.429(3) 6_655 ? 
N4 Zn1 1.993(2) . ? 
N6 Zn1 1.993(2) . ? 
N8 O5 1.213(3) . ? 
N8 O4 1.221(3) . ? 
N8 O3 1.239(3) . ? 
O2 Zn1 2.1018(19) . ? 
O1W H1WA 0.8501 . ? 
O1W H1WD 0.8501 . ? 
O2W H2WA 0.8497 . ? 
O2W H2WC 0.8500 . ? 
O3W H3WB 0.8499 . ? 
O3W H3WC 0.8501 . ? 
O4W H4WB 0.8500 . ? 
O4W H4WC 0.8500 . ? 
O5W H5WD 0.8500 . ? 
O5W H5WC 0.8501 . ? 
O6W H6WA 0.8503 . ? 
O6W H6WB 0.8501 . ? 
O7W H7WA 0.8500 . ? 
O7W H7WC 0.8498 . ? 
O8W H8WB 0.8502 . ? 
O8W H8WC 0.8501 . ? 
 
loop_ 
 _geom_angle_atom_site_label_1 
 _geom_angle_atom_site_label_2 
 _geom_angle_atom_site_label_3 
 _geom_angle 
 _geom_angle_site_symmetry_1 
 _geom_angle_site_symmetry_3 
 _geom_angle_publ_flag 
C2 C1 N1 111.5(2) . . ? 
C2 C1 H1 124.2 . . ? 
N1 C1 H1 124.2 . . ? 
C1 C2 N2 106.8(3) . . ? 
C1 C2 H2 126.6 . . ? 
N2 C2 H2 126.6 . . ? 
N1 C3 N2 113.9(2) . . ? 
N1 C3 H3 123.1 . . ? 
N2 C3 H3 123.1 . . ? 
C5 C4 N4 110.6(2) . . ? 
C5 C4 H4 124.7 . . ? 
N4 C4 H4 124.7 . . ? 
C4 C5 N5 105.9(2) . . ? 
C4 C5 H5 127.0 . . ? 
N5 C5 H5 127.0 . . ? 
N4 C6 N5 110.6(2) . . ? 
N4 C6 H6 124.7 . . ? 
N5 C6 H6 124.7 . . ? 
N7 C7 N6 109.2(2) . . ? 
N7 C7 H7 125.4 . . ? 
N6 C7 H7 125.4 . . ? 
N6 C8 C9 112.0(2) . . ? 
N6 C8 H8 124.0 . . ? 
C9 C8 H8 124.0 . . ? 
C8 C9 N7 104.4(2) . . ? 
C8 C9 H9 127.8 . . ? 
N7 C9 H9 127.8 . . ? 
C11 C10 C15 120.0 . . ? 
C11 C10 N2 119.85(13) . . ? 
C15 C10 N2 119.96(13) . . ? 
C12 C11 C10 120.0 . . ? 
C12 C11 H11 120.0 . . ? 
C10 C11 H11 120.0 . . ? 
C11 C12 C13 120.0 . . ? 
C11 C12 H12 120.0 . . ? 
C13 C12 H12 120.0 . . ? 
C12 C13 C14 120.0 . . ? 
C12 C13 N3 118.76(13) . . ? 
C14 C13 N3 121.12(13) . . ? 
C13 C14 C15 120.0 . . ? 
C13 C14 H14 120.0 . . ? 
C15 C14 H14 120.0 . . ? 
C14 C15 C10 120.0 . . ? 
C14 C15 H15 120.0 . . ? 
C10 C15 H15 120.0 . . ? 
C17 C16 C21 121.9(2) . . ? 
C17 C16 N5 120.2(2) . . ? 
C21 C16 N5 117.7(2) . . ? 
C16 C17 C18 119.5(2) . . ? 
C16 C17 H17 120.2 . . ? 
C18 C17 H17 120.2 . . ? 
C19 C18 C17 120.6(2) . . ? 
C19 C18 H18 119.7 . . ? 
C17 C18 H18 119.7 . . ? 
C18 C19 C20 119.0(2) . . ? 
C18 C19 N3 123.1(2) . 7_656 ? 
C20 C19 N3 117.9(2) . 7_656 ? 
C21 C20 C19 120.4(2) . . ? 
C21 C20 H20 119.8 . . ? 
C19 C20 H20 119.8 . . ? 
C20 C21 C16 118.3(2) . . ? 
C20 C21 H21 120.8 . . ? 
C16 C21 H21 120.8 . . ? 
C23 C22 C27 119.1(2) . . ? 
C23 C22 N7 121.0(2) . . ? 
C27 C22 N7 119.7(2) . . ? 
C22 C23 C24 116.7(2) . . ? 
C22 C23 H23 121.7 . . ? 
C24 C23 H23 121.7 . . ? 
C25 C24 C23 125.1(2) . . ? 
C25 C24 H24 117.5 . . ? 
C23 C24 H24 117.5 . . ? 
C26 C25 C24 115.9(2) . . ? 
C26 C25 N3 121.3(2) . 6 ? 
C24 C25 N3 122.8(2) . 6 ? 
C25 C26 C27 124.9(3) . . ? 
C25 C26 H26 117.6 . . ? 
C27 C26 H26 117.6 . . ? 
C26 C27 C22 117.6(2) . . ? 
C26 C27 H27 121.2 . . ? 
C22 C27 H27 121.2 . . ? 
O2 C28 O1 121.1(3) . . ? 
O2 C28 C29 117.7(3) . . ? 
O1 C28 C29 120.6(3) . . ? 
C28 C29 C28 105.5(3) . 2_565 ? 
C28 C29 H29A 110.6 . . ? 
C28 C29 H29A 110.6 2_565 . ? 
C28 C29 H29B 110.6 . . ? 
C28 C29 H29B 110.6 2_565 . ? 
H29A C29 H29B 108.8 . . ? 
C3 N1 C1 103.5(2) . . ? 
C3 N1 Zn1 126.37(19) . . ? 
C1 N1 Zn1 128.30(17) . . ? 
C3 N2 C2 104.2(2) . . ? 
C3 N2 C10 128.0(2) . . ? 
C2 N2 C10 127.6(2) . . ? 
C19 N3 C25 117.7(2) 7_665 6_655 ? 
C19 N3 C13 120.7(2) 7_665 . ? 
C25 N3 C13 119.5(2) 6_655 . ? 
C6 N4 C4 107.4(2) . . ? 
C6 N4 Zn1 124.44(17) . . ? 
C4 N4 Zn1 127.90(17) . . ? 
C6 N5 C5 105.5(2) . . ? 
C6 N5 C16 128.1(2) . . ? 
C5 N5 C16 126.3(2) . . ? 
C8 N6 C7 105.7(2) . . ? 
C8 N6 Zn1 130.30(18) . . ? 
C7 N6 Zn1 123.97(17) . . ? 
C7 N7 C9 108.7(2) . . ? 
C7 N7 C22 124.4(2) . . ? 
C9 N7 C22 126.9(2) . . ? 
O5 N8 O4 120.3(2) . . ? 
O5 N8 O3 120.2(2) . . ? 
O4 N8 O3 119.1(2) . . ? 
C28 O2 Zn1 106.5(2) . . ? 
H1WA O1W H1WD 125.1 . . ? 
H2WA O2W H2WC 109.5 . . ? 
H3WB O3W H3WC 109.5 . . ? 
H4WB O4W H4WC 109.5 . . ? 
H5WD O5W H5WC 109.5 . . ? 
H6WA O6W H6WB 109.4 . . ? 
H7WA O7W H7WC 109.5 . . ? 
H8WB O8W H8WC 109.5 . . ? 
N4 Zn1 N6 109.74(9) . . ? 
N4 Zn1 N1 108.17(9) . . ? 
N6 Zn1 N1 107.52(9) . . ? 
N4 Zn1 O2 118.42(8) . . ? 
N6 Zn1 O2 111.62(8) . . ? 
N1 Zn1 O2 100.45(9) . . ? 
 
loop_ 
 _geom_torsion_atom_site_label_1 
 _geom_torsion_atom_site_label_2 
 _geom_torsion_atom_site_label_3 
 _geom_torsion_atom_site_label_4 
 _geom_torsion 
 _geom_torsion_site_symmetry_1 
 _geom_torsion_site_symmetry_2 
 _geom_torsion_site_symmetry_3 
 _geom_torsion_site_symmetry_4 
 _geom_torsion_publ_flag 
N1 C1 C2 N2 2.0(3) . . . . ? 
N4 C4 C5 N5 0.9(3) . . . . ? 
N6 C8 C9 N7 -0.2(3) . . . . ? 
C15 C10 C11 C12 0.0 . . . . ? 
N2 C10 C11 C12 -174.97(18) . . . . ? 
C10 C11 C12 C13 0.0 . . . . ? 
C11 C12 C13 C14 0.0 . . . . ? 
C11 C12 C13 N3 176.17(17) . . . . ? 
C12 C13 C14 C15 0.0 . . . . ? 
N3 C13 C14 C15 -176.08(18) . . . . ? 
C13 C14 C15 C10 0.0 . . . . ? 
C11 C10 C15 C14 0.0 . . . . ? 
N2 C10 C15 C14 174.96(18) . . . . ? 
C21 C16 C17 C18 0.4(4) . . . . ? 
N5 C16 C17 C18 174.9(2) . . . . ? 
C16 C17 C18 C19 1.8(4) . . . . ? 
C17 C18 C19 C20 0.0(4) . . . . ? 
C17 C18 C19 N3 178.2(2) . . . 7_656 ? 
C18 C19 C20 C21 -4.0(4) . . . . ? 
N3 C19 C20 C21 177.7(2) 7_656 . . . ? 
C19 C20 C21 C16 6.0(4) . . . . ? 
C17 C16 C21 C20 -4.2(4) . . . . ? 
N5 C16 C21 C20 -178.9(2) . . . . ? 
C27 C22 C23 C24 4.9(4) . . . . ? 
N7 C22 C23 C24 -179.4(2) . . . . ? 
C22 C23 C24 C25 -2.2(5) . . . . ? 
C23 C24 C25 C26 3.2(5) . . . . ? 
C23 C24 C25 N3 -178.0(3) . . . 6 ? 
C24 C25 C26 C27 -7.7(4) . . . . ? 
N3 C25 C26 C27 173.5(3) 6 . . . ? 
C25 C26 C27 C22 10.7(5) . . . . ? 
C23 C22 C27 C26 -8.9(4) . . . . ? 
N7 C22 C27 C26 175.4(3) . . . . ? 
O2 C28 C29 C28 132.1(3) . . . 2_565 ? 
O1 C28 C29 C28 -56.1(2) . . . 2_565 ? 
N2 C3 N1 C1 2.9(3) . . . . ? 
N2 C3 N1 Zn1 168.32(17) . . . . ? 
C2 C1 N1 C3 -3.0(3) . . . . ? 
C2 C1 N1 Zn1 -168.01(19) . . . . ? 
N1 C3 N2 C2 -1.8(3) . . . . ? 
N1 C3 N2 C10 -177.4(2) . . . . ? 
C1 C2 N2 C3 -0.2(3) . . . . ? 
C1 C2 N2 C10 175.4(2) . . . . ? 
C11 C10 N2 C3 132.5(2) . . . . ? 
C15 C10 N2 C3 -42.5(3) . . . . ? 
C11 C10 N2 C2 -42.1(3) . . . . ? 
C15 C10 N2 C2 142.9(2) . . . . ? 
C12 C13 N3 C19 -34.1(3) . . . 7_665 ? 
C14 C13 N3 C19 142.06(19) . . . 7_665 ? 
C12 C13 N3 C25 162.60(16) . . . 6_655 ? 
C14 C13 N3 C25 -21.3(3) . . . 6_655 ? 
N5 C6 N4 C4 -1.3(3) . . . . ? 
N5 C6 N4 Zn1 -175.75(16) . . . . ? 
C5 C4 N4 C6 0.2(3) . . . . ? 
C5 C4 N4 Zn1 174.41(18) . . . . ? 
N4 C6 N5 C5 1.8(3) . . . . ? 
N4 C6 N5 C16 177.4(2) . . . . ? 
C4 C5 N5 C6 -1.6(3) . . . . ? 
C4 C5 N5 C16 -177.2(2) . . . . ? 
C17 C16 N5 C6 -149.3(3) . . . . ? 
C21 C16 N5 C6 25.4(4) . . . . ? 
C17 C16 N5 C5 25.3(4) . . . . ? 
C21 C16 N5 C5 -159.9(2) . . . . ? 
C9 C8 N6 C7 -0.4(3) . . . . ? 
C9 C8 N6 Zn1 -177.9(2) . . . . ? 
N7 C7 N6 C8 0.8(3) . . . . ? 
N7 C7 N6 Zn1 178.59(18) . . . . ? 
N6 C7 N7 C9 -1.0(3) . . . . ? 
N6 C7 N7 C22 179.2(2) . . . . ? 
C8 C9 N7 C7 0.7(3) . . . . ? 
C8 C9 N7 C22 -179.5(3) . . . . ? 
C23 C22 N7 C7 9.8(4) . . . . ? 
C27 C22 N7 C7 -174.5(3) . . . . ? 
C23 C22 N7 C9 -170.0(3) . . . . ? 
C27 C22 N7 C9 5.7(4) . . . . ? 
O1 C28 O2 Zn1 18.3(3) . . . . ? 
C29 C28 O2 Zn1 -169.88(17) . . . . ? 
C6 N4 Zn1 N6 -119.7(2) . . . . ? 
C4 N4 Zn1 N6 67.0(2) . . . . ? 
C6 N4 Zn1 N1 123.3(2) . . . . ? 
C4 N4 Zn1 N1 -50.0(2) . . . . ? 
C6 N4 Zn1 O2 10.0(2) . . . . ? 
C4 N4 Zn1 O2 -163.2(2) . . . . ? 
C8 N6 Zn1 N4 -51.0(3) . . . . ? 
C7 N6 Zn1 N4 131.9(2) . . . . ? 
C8 N6 Zn1 N1 66.5(3) . . . . ? 
C7 N6 Zn1 N1 -110.7(2) . . . . ? 
C8 N6 Zn1 O2 175.7(2) . . . . ? 
C7 N6 Zn1 O2 -1.5(3) . . . . ? 
C3 N1 Zn1 N4 71.6(2) . . . . ? 
C1 N1 Zn1 N4 -126.6(2) . . . . ? 
C3 N1 Zn1 N6 -46.9(2) . . . . ? 
C1 N1 Zn1 N6 114.9(2) . . . . ? 
C3 N1 Zn1 O2 -163.7(2) . . . . ? 
C1 N1 Zn1 O2 -1.9(2) . . . . ? 
C28 O2 Zn1 N4 -68.8(2) . . . . ? 
C28 O2 Zn1 N6 60.1(2) . . . . ? 
C28 O2 Zn1 N1 173.8(2) . . . . ? 
 
_diffrn_measured_fraction_theta_max    0.999 
_diffrn_reflns_theta_full              26.00 
_diffrn_measured_fraction_theta_full   0.999 
_refine_diff_density_max    0.366 
_refine_diff_density_min   -0.315 
_refine_diff_density_rms    0.052 


# === END

 
data_Compound2 
 
_audit_creation_method            SHELXL-97 
_chemical_name_systematic 
; 
 ? 
; 
_chemical_name_common             ? 
_chemical_melting_point           ? 
_chemical_formula_moiety          'C59 H48 N14 O4 Zn2,  0.3(H4 O2), H1.20 O0.60, 2(N0.50 O1.50), N O3,  0.8(H2 O)'
_chemical_formula_sum 
 'C59 H52 N16 O12 Zn2' 
_chemical_formula_weight          1307.91 
 
loop_ 
 _atom_type_symbol 
 _atom_type_description 
 _atom_type_scat_dispersion_real 
 _atom_type_scat_dispersion_imag 
 _atom_type_scat_source 
 'C'  'C'   0.0033   0.0016 
 'International Tables Vol C Tables 4.2.6.8 and 6.1.1.4' 
 'H'  'H'   0.0000   0.0000 
 'International Tables Vol C Tables 4.2.6.8 and 6.1.1.4' 
 'N'  'N'   0.0061   0.0033 
 'International Tables Vol C Tables 4.2.6.8 and 6.1.1.4' 
 'O'  'O'   0.0106   0.0060 
 'International Tables Vol C Tables 4.2.6.8 and 6.1.1.4' 
 'Zn'  'Zn'   0.2839   1.4301 
 'International Tables Vol C Tables 4.2.6.8 and 6.1.1.4' 
 
_symmetry_cell_setting            Orthorhombic 
_symmetry_space_group_name_H-M    P2221 
_symmetry_space_group_name_Hall   'P 2c 2'
 
loop_ 
 _symmetry_equiv_pos_as_xyz 
 'x, y, z' 
 '-x, -y, z+1/2' 
 'x, -y, -z' 
 '-x, y, -z+1/2' 
 
_cell_length_a                    7.9114(11) 
_cell_length_b                    14.2572(19) 
_cell_length_c                    29.557(2) 
_cell_angle_alpha                 90.00 
_cell_angle_beta                  90.00 
_cell_angle_gamma                 90.00 
_cell_volume                      3333.8(7) 
_cell_formula_units_Z             2 
_cell_measurement_temperature     291(2) 
_cell_measurement_reflns_used     5757 
_cell_measurement_theta_min       2.51 
_cell_measurement_theta_max       23.76 
 
_exptl_crystal_description        ? 
_exptl_crystal_colour             ? 
_exptl_crystal_size_max           0.28 
_exptl_crystal_size_mid           0.24 
_exptl_crystal_size_min           0.24 
_exptl_crystal_density_meas       ? 
_exptl_crystal_density_diffrn     1.303 
_exptl_crystal_density_method     'not measured' 
_exptl_crystal_F_000              1348 
_exptl_absorpt_coefficient_mu     0.788 
_exptl_absorpt_correction_type    'multi-scan' 
_exptl_absorpt_correction_T_min   0.8095 
_exptl_absorpt_correction_T_max   0.8334 
_exptl_absorpt_process_details    'SADABS; Bruker, 2000' 
 
_exptl_special_details 
; 
 ? 
; 
 
_diffrn_ambient_temperature       291(2) 
_diffrn_radiation_wavelength      0.71073 
_diffrn_radiation_type            MoK\a 
_diffrn_radiation_source          'fine-focus sealed tube' 
_diffrn_radiation_monochromator   graphite 
_diffrn_measurement_device_type   ? 
_diffrn_measurement_method        ? 
_diffrn_detector_area_resol_mean  ? 
_diffrn_standards_number          ? 
_diffrn_standards_interval_count  ? 
_diffrn_standards_interval_time   ? 
_diffrn_standards_decay_%         ? 
_diffrn_reflns_number             17988 
_diffrn_reflns_av_R_equivalents   0.0518 
_diffrn_reflns_av_sigmaI/netI     0.0769 
_diffrn_reflns_limit_h_min        -9 
_diffrn_reflns_limit_h_max        9 
_diffrn_reflns_limit_k_min        -17 
_diffrn_reflns_limit_k_max        15 
_diffrn_reflns_limit_l_min        -27 
_diffrn_reflns_limit_l_max        36 
_diffrn_reflns_theta_min          1.98 
_diffrn_reflns_theta_max          26.00 
_reflns_number_total              6530 
_reflns_number_gt                 4922 
_reflns_threshold_expression      >2sigma(I) 
 
_computing_data_collection        ? 
_computing_cell_refinement        ? 
_computing_data_reduction         ? 
_computing_structure_solution     'SHELXS-97 (Sheldrick, 1990)' 
_computing_structure_refinement   'SHELXL-97 (Sheldrick, 1997)' 
_computing_molecular_graphics     ? 
_computing_publication_material   ? 
 
_refine_special_details 
; 
 Refinement of F^2^ against ALL reflections.  The weighted R-factor wR and 
 goodness of fit S are based on F^2^, conventional R-factors R are based 
 on F, with F set to zero for negative F^2^. The threshold expression of 
 F^2^ > 2sigma(F^2^) is used only for calculating R-factors(gt) etc. and is 
 not relevant to the choice of reflections for refinement.  R-factors based 
 on F^2^ are statistically about twice as large as those based on F, and R- 
 factors based on ALL data will be even larger. 
; 
 
_refine_ls_structure_factor_coef  Fsqd  
_refine_ls_matrix_type            full 
_refine_ls_weighting_scheme       calc  
_refine_ls_weighting_details 
 'calc w=1/[\s^2^(Fo^2^)+(0.0741P)^2^+0.0000P] where P=(Fo^2^+2Fc^2^)/3' 
_atom_sites_solution_primary      direct 
_atom_sites_solution_secondary    difmap 
_atom_sites_solution_hydrogens    geom 
_refine_ls_hydrogen_treatment     constr 
_refine_ls_extinction_method      none 
_refine_ls_extinction_coef        ? 
_refine_ls_abs_structure_details 
 'Flack H D (1983), Acta Cryst. A39, 876-881' 
_refine_ls_abs_structure_Flack    0.028(19) 
_refine_ls_number_reflns          6530 
_refine_ls_number_parameters      435 
_refine_ls_number_restraints      0 
_refine_ls_R_factor_all           0.0845 
_refine_ls_R_factor_gt            0.0678 
_refine_ls_wR_factor_ref          0.1452 
_refine_ls_wR_factor_gt           0.1412 
_refine_ls_goodness_of_fit_ref    1.067 
_refine_ls_restrained_S_all       1.067 
_refine_ls_shift/su_max           0.000 
_refine_ls_shift/su_mean          0.000 
 
loop_ 
 _atom_site_label 
 _atom_site_type_symbol 
 _atom_site_fract_x 
 _atom_site_fract_y 
 _atom_site_fract_z 
 _atom_site_U_iso_or_equiv 
 _atom_site_adp_type 
 _atom_site_occupancy 
 _atom_site_symmetry_multiplicity 
 _atom_site_calc_flag 
 _atom_site_refinement_flags 
 _atom_site_disorder_assembly 
 _atom_site_disorder_group 
C1 C 0.3823(7) 0.5710(3) 0.86154(17) 0.0489(12) Uani 1 1 d . . . 
H1 H 0.4018 0.5732 0.8926 0.059 Uiso 1 1 calc R . . 
C2 C 0.3285(6) 0.6421(4) 0.83631(16) 0.0458(11) Uani 1 1 d . . . 
H2 H 0.3070 0.7028 0.8464 0.055 Uiso 1 1 calc R . . 
C3 C 0.3577(6) 0.5205(3) 0.79356(17) 0.0449(11) Uani 1 1 d . . . 
H3 H 0.3573 0.4820 0.7682 0.054 Uiso 1 1 calc R . . 
C4 C 0.2582(7) 0.6613(4) 0.75384(19) 0.0535(12) Uani 1 1 d . . . 
C5 C 0.2863(6) 0.7567(3) 0.7519(2) 0.0537(11) Uani 1 1 d . . . 
H5 H 0.3386 0.7879 0.7757 0.064 Uiso 1 1 calc R . . 
C6 C 0.2355(7) 0.8046(4) 0.71403(17) 0.0516(13) Uani 1 1 d . . . 
H6 H 0.2507 0.8692 0.7128 0.062 Uiso 1 1 calc R . . 
C7 C 0.1612(6) 0.7585(3) 0.67709(15) 0.0421(10) Uani 1 1 d . . . 
C8 C 0.1334(6) 0.6611(3) 0.67974(16) 0.0447(11) Uani 1 1 d . . . 
H8 H 0.0823 0.6291 0.6560 0.054 Uiso 1 1 calc R . . 
C9 C 0.1842(7) 0.6134(4) 0.71874(17) 0.0556(14) Uani 1 1 d . . . 
H9 H 0.1678 0.5489 0.7209 0.067 Uiso 1 1 calc R . . 
C10 C 0.3616(7) 0.6557(4) 0.44154(17) 0.0534(13) Uani 1 1 d . . . 
H10 H 0.4453 0.6993 0.4483 0.064 Uiso 1 1 calc R . . 
C11 C 0.2152(8) 0.5521(4) 0.40768(19) 0.0560(14) Uani 1 1 d . . . 
H11 H 0.1794 0.5096 0.3858 0.067 Uiso 1 1 calc R . . 
C12 C 0.1398(8) 0.5671(4) 0.44805(18) 0.0553(13) Uani 1 1 d . . . 
H12 H 0.0423 0.5381 0.4587 0.066 Uiso 1 1 calc R . . 
C13 C 0.2016(6) 0.6734(3) 0.51258(15) 0.0427(11) Uani 1 1 d . . . 
C14 C 0.0399(6) 0.7032(3) 0.52403(16) 0.0458(12) Uani 1 1 d . . . 
H14 H -0.0491 0.6944 0.5039 0.055 Uiso 1 1 calc R . . 
C15 C 0.0111(8) 0.7461(3) 0.56554(14) 0.0468(11) Uani 1 1 d . . . 
H15 H -0.0971 0.7661 0.5732 0.056 Uiso 1 1 calc R . . 
C16 C 0.1441(6) 0.7593(4) 0.59560(17) 0.0477(11) Uani 1 1 d . . . 
C17 C 0.3059(7) 0.7296(3) 0.58415(16) 0.0467(12) Uani 1 1 d . . . 
H17 H 0.3949 0.7384 0.6043 0.056 Uiso 1 1 calc R . . 
C18 C 0.3346(7) 0.6866(4) 0.54264(18) 0.0514(13) Uani 1 1 d . . . 
H18 H 0.4428 0.6667 0.5350 0.062 Uiso 1 1 calc R . . 
C19 C 0.7142(7) 0.8005(4) 0.3569(2) 0.0571(14) Uani 1 1 d . . . 
H19 H 0.6327 0.8406 0.3451 0.069 Uiso 1 1 calc R . . 
C20 C 0.8402(7) 0.6772(4) 0.38252(18) 0.0509(12) Uani 1 1 d . . . 
H20 H 0.8582 0.6157 0.3918 0.061 Uiso 1 1 calc R . . 
C21 C 0.9531(7) 0.7454(4) 0.38483(17) 0.0563(14) Uani 1 1 d . . . 
H21 H 1.0640 0.7406 0.3950 0.068 Uiso 1 1 calc R . . 
C22 C 0.9424(8) 0.9172(4) 0.3658(2) 0.0602(15) Uani 1 1 d . . . 
C23 C 1.0430(7) 0.9514(4) 0.40063(19) 0.0537(13) Uani 1 1 d . . . 
H23 H 1.0705 0.9130 0.4250 0.064 Uiso 1 1 calc R . . 
C24 C 1.1024(7) 1.0431(3) 0.39910(19) 0.0537(14) Uani 1 1 d . . . 
H24 H 1.1697 1.0661 0.4224 0.064 Uiso 1 1 calc R . . 
C25 C 1.0613(7) 1.1005(4) 0.36272(17) 0.0520(13) Uani 1 1 d . . . 
C26 C 0.9607(6) 1.0663(3) 0.32788(16) 0.0468(12) Uani 1 1 d . . . 
H26 H 0.9332 1.1047 0.3035 0.056 Uiso 1 1 calc R . . 
C27 C 0.9013(6) 0.9746(4) 0.32942(17) 0.0480(12) Uani 1 1 d . . . 
H27 H 0.8340 0.9517 0.3061 0.058 Uiso 1 1 calc R . . 
C28 C 0.2668(7) 0.7022(4) 0.2948(2) 0.0591(14) Uani 1 1 d . . . 
C29 C 0.1422(7) 0.7507(4) 0.2685(2) 0.0625(15) Uani 1 1 d . . . 
H29A H 0.1988 0.7808 0.2432 0.075 Uiso 1 1 calc R . . 
H29B H 0.0935 0.7999 0.2870 0.075 Uiso 1 1 calc R . . 
C30 C 0.0000 0.6913(5) 0.2500 0.0534(16) Uani 1 2 d S . . 
H30A H -0.0438 0.6513 0.2738 0.064 Uiso 0.50 1 d PR . . 
H30B H 0.0438 0.6513 0.2262 0.064 Uiso 0.50 1 d PR . . 
N1 N 0.4047(5) 0.4926(3) 0.83403(15) 0.0507(10) Uani 1 1 d . . . 
N2 N 0.3106(6) 0.6104(3) 0.79300(14) 0.0527(11) Uani 1 1 d . . . 
N3 N 0.1146(5) 0.8049(3) 0.63709(13) 0.0463(10) Uani 1 1 d . . . 
N4 N 0.3514(6) 0.6093(3) 0.40431(14) 0.0494(10) Uani 1 1 d . . . 
N5 N 0.2319(5) 0.6317(3) 0.46976(13) 0.0451(9) Uani 1 1 d . . . 
N6 N 0.6928(6) 0.7108(3) 0.36443(16) 0.0555(11) Uani 1 1 d . . . 
N7 N 0.8725(6) 0.8263(3) 0.36885(16) 0.0575(12) Uani 1 1 d . . . 
N8 N 0.6923(8) 0.5000 0.5000 0.0466(14) Uani 1 2 d S . . 
N9 N 0.5785(11) 0.0889(6) 0.3771(3) 0.047(2) Uani 0.50 1 d P . . 
O1 O 0.3587(5) 0.7476(3) 0.31786(12) 0.0546(9) Uani 1 1 d . . . 
O2 O 0.2993(5) 0.6207(3) 0.29539(13) 0.0581(10) Uani 1 1 d . . . 
O3 O 0.6413(8) 0.1378(5) 0.4036(2) 0.0493(16) Uani 0.50 1 d P . . 
O4 O 0.5406(9) 0.0107(5) 0.3889(2) 0.055(2) Uani 0.50 1 d P . . 
O5 O 0.5528(9) 0.1149(5) 0.3416(2) 0.0557(18) Uani 0.50 1 d P . . 
O6 O 0.7682(5) 0.5215(2) 0.53424(13) 0.0540(9) Uani 1 1 d . . . 
O7 O 0.5363(6) 0.5000 0.5000 0.0501(12) Uani 1 2 d S . . 
O1W O 0.4459(11) 0.9467(6) 0.2959(3) 0.050(2) Uani 0.40 1 d P . . 
H1X H 0.3707 0.9050 0.2915 0.060 Uiso 0.40 1 d PR . . 
H1Y H 0.4041 0.9913 0.3113 0.060 Uiso 0.40 1 d PR . . 
O2W O 0.7626(17) 1.006(3) 0.5041(19) 0.074(7) Uani 0.30 1 d P . . 
H2X H 0.8362 0.9661 0.5119 0.089 Uiso 0.30 1 d PR . . 
H2Y H 0.6738 0.9784 0.4952 0.089 Uiso 0.30 1 d PR . . 
O3W O 0.4267(11) 0.0000 0.5000 0.055(2) Uani 0.60 2 d SP . . 
H3X H 0.3934 -0.0229 0.5250 0.066 Uiso 0.30 1 d PR . . 
H3Y H 0.3846 0.0544 0.4966 0.066 Uiso 0.30 1 d PR . . 
Zn1 Zn 0.49221(8) 0.63126(4) 0.349439(17) 0.04625(16) Uani 1 1 d . . . 
 
loop_ 
 _atom_site_aniso_label 
 _atom_site_aniso_U_11 
 _atom_site_aniso_U_22 
 _atom_site_aniso_U_33 
 _atom_site_aniso_U_23 
 _atom_site_aniso_U_13 
 _atom_site_aniso_U_12 
C1 0.051(3) 0.048(3) 0.048(3) 0.010(2) -0.015(2) 0.013(2) 
C2 0.037(2) 0.049(3) 0.052(3) 0.001(2) -0.007(2) 0.011(2) 
C3 0.053(3) 0.043(3) 0.039(3) 0.012(2) 0.002(2) -0.001(2) 
C4 0.063(3) 0.065(3) 0.032(2) 0.012(3) 0.000(3) 0.007(2) 
C5 0.055(3) 0.062(3) 0.044(3) 0.001(3) 0.006(3) 0.011(2) 
C6 0.048(3) 0.057(3) 0.049(3) 0.008(2) 0.006(2) 0.012(2) 
C7 0.044(2) 0.044(2) 0.038(2) 0.004(2) 0.005(2) 0.013(2) 
C8 0.047(3) 0.045(3) 0.042(3) 0.003(2) 0.003(2) 0.016(2) 
C9 0.063(3) 0.058(3) 0.046(3) 0.014(2) 0.005(2) 0.018(3) 
C10 0.065(3) 0.050(3) 0.046(3) -0.004(2) 0.014(3) -0.009(2) 
C11 0.061(4) 0.055(3) 0.052(3) -0.010(2) 0.008(3) -0.003(3) 
C12 0.064(4) 0.050(3) 0.052(3) 0.009(2) -0.001(3) -0.004(3) 
C13 0.047(3) 0.050(3) 0.031(2) 0.007(2) 0.009(2) 0.013(2) 
C14 0.041(3) 0.049(2) 0.048(3) 0.008(2) 0.006(2) 0.018(2) 
C15 0.049(3) 0.051(2) 0.040(2) -0.0048(19) 0.005(3) 0.019(3) 
C16 0.039(3) 0.064(3) 0.040(2) 0.010(2) 0.013(2) 0.014(2) 
C17 0.056(3) 0.048(3) 0.037(3) -0.007(2) -0.002(2) 0.011(2) 
C18 0.043(3) 0.062(3) 0.049(3) -0.006(2) 0.012(2) 0.005(2) 
C19 0.055(3) 0.053(3) 0.064(4) 0.020(3) -0.005(3) -0.008(2) 
C20 0.053(3) 0.052(3) 0.048(3) 0.004(2) -0.013(2) -0.010(2) 
C21 0.065(4) 0.056(3) 0.048(3) 0.014(2) -0.012(2) -0.010(3) 
C22 0.064(4) 0.055(3) 0.061(3) 0.003(3) -0.006(3) -0.015(3) 
C23 0.054(4) 0.048(3) 0.059(3) 0.013(2) -0.016(2) -0.012(2) 
C24 0.058(3) 0.044(3) 0.059(3) 0.017(2) -0.015(3) -0.024(2) 
C25 0.053(3) 0.059(3) 0.044(3) 0.015(2) -0.012(2) -0.018(2) 
C26 0.049(3) 0.050(3) 0.042(2) 0.014(2) -0.009(2) -0.016(2) 
C27 0.039(3) 0.061(3) 0.043(3) 0.004(2) -0.007(2) -0.013(2) 
C28 0.047(3) 0.062(3) 0.068(4) 0.001(3) -0.022(3) 0.021(3) 
C29 0.049(3) 0.072(4) 0.067(3) 0.001(3) -0.017(3) 0.022(3) 
C30 0.038(3) 0.075(4) 0.047(4) 0.000 0.008(4) 0.000 
N1 0.045(2) 0.056(2) 0.050(2) 0.008(2) -0.0021(19) 0.0068(19) 
N2 0.062(3) 0.059(3) 0.038(2) 0.0079(19) -0.0040(19) 0.022(2) 
N3 0.057(3) 0.047(2) 0.035(2) 0.0021(16) 0.0107(18) 0.0198(19) 
N4 0.056(3) 0.051(2) 0.041(2) -0.0098(18) 0.0116(19) -0.007(2) 
N5 0.043(2) 0.048(2) 0.045(2) 0.0019(19) 0.0176(17) -0.0025(19) 
N6 0.055(3) 0.049(3) 0.062(3) 0.007(2) -0.010(2) -0.010(2) 
N7 0.063(3) 0.047(2) 0.062(3) 0.015(2) -0.011(2) -0.011(2) 
N8 0.048(4) 0.047(3) 0.045(3) -0.014(3) 0.000 0.000 
N9 0.050(5) 0.048(5) 0.043(5) 0.008(4) 0.006(4) 0.015(4) 
O1 0.057(2) 0.057(2) 0.050(2) 0.0177(18) -0.0081(18) -0.0138(18) 
O2 0.052(2) 0.055(2) 0.067(2) -0.0058(18) -0.0162(17) 0.0235(18) 
O3 0.046(4) 0.053(4) 0.049(4) -0.022(3) -0.008(3) 0.022(3) 
O4 0.058(5) 0.058(4) 0.049(4) 0.015(3) 0.023(3) 0.015(3) 
O5 0.058(4) 0.055(4) 0.055(4) 0.024(3) 0.013(3) 0.018(3) 
O6 0.052(2) 0.054(2) 0.056(2) -0.0160(17) 0.0158(18) -0.0155(17) 
O7 0.042(3) 0.053(3) 0.056(3) -0.018(2) 0.000 0.000 
O1W 0.055(5) 0.050(4) 0.046(4) 0.017(4) -0.015(4) -0.007(4) 
O2W 0.068(8) 0.085(12) 0.070(18) 0.005(10) -0.021(15) -0.045(14) 
O3W 0.065(5) 0.047(4) 0.053(5) -0.008(4) 0.000 0.000 
Zn1 0.0523(3) 0.0468(3) 0.0396(3) -0.0084(2) 0.0074(3) -0.0072(3) 
 
_geom_special_details 
; 
 All esds (except the esd in the dihedral angle between two l.s. planes) 
 are estimated using the full covariance matrix.  The cell esds are taken 
 into account individually in the estimation of esds in distances, angles 
 and torsion angles; correlations between esds in cell parameters are only 
 used when they are defined by crystal symmetry.  An approximate (isotropic) 
 treatment of cell esds is used for estimating esds involving l.s. planes. 
; 
 
loop_ 
 _geom_bond_atom_site_label_1 
 _geom_bond_atom_site_label_2 
 _geom_bond_distance 
 _geom_bond_site_symmetry_2 
 _geom_bond_publ_flag 
C1 C2 1.329(6) . ? 
C1 N1 1.394(6) . ? 
C1 H1 0.9300 . ? 
C2 N2 1.365(6) . ? 
C2 H2 0.9300 . ? 
C3 N1 1.315(6) . ? 
C3 N2 1.335(6) . ? 
C3 H3 0.9300 . ? 
C4 C9 1.373(8) . ? 
C4 C5 1.381(7) . ? 
C4 N2 1.427(6) . ? 
C5 C6 1.371(8) . ? 
C5 H5 0.9300 . ? 
C6 C7 1.403(7) . ? 
C6 H6 0.9300 . ? 
C7 N3 1.404(6) . ? 
C7 C8 1.408(7) . ? 
C8 C9 1.398(7) . ? 
C8 H8 0.9300 . ? 
C9 H9 0.9300 . ? 
C10 N4 1.286(6) . ? 
C10 N5 1.366(6) . ? 
C10 H10 0.9300 . ? 
C11 C12 1.351(8) . ? 
C11 N4 1.355(7) . ? 
C11 H11 0.9300 . ? 
C12 N5 1.338(7) . ? 
C12 H12 0.9300 . ? 
C13 C14 1.390(6) . ? 
C13 C18 1.390(7) . ? 
C13 N5 1.419(6) . ? 
C14 C15 1.390(6) . ? 
C14 H14 0.9300 . ? 
C15 C16 1.390(8) . ? 
C15 H15 0.9300 . ? 
C16 C17 1.390(7) . ? 
C16 N3 1.407(6) . ? 
C17 C18 1.390(7) . ? 
C17 H17 0.9300 . ? 
C18 H18 0.9300 . ? 
C19 N6 1.310(7) . ? 
C19 N7 1.352(7) . ? 
C19 H19 0.9300 . ? 
C20 C21 1.322(7) . ? 
C20 N6 1.369(7) . ? 
C20 H20 0.9300 . ? 
C21 N7 1.400(7) . ? 
C21 H21 0.9300 . ? 
C22 C23 1.390(7) . ? 
C22 C27 1.390(7) . ? 
C22 N7 1.412(7) . ? 
C23 C24 1.390(7) . ? 
C23 H23 0.9300 . ? 
C24 C25 1.390(7) . ? 
C24 H24 0.9300 . ? 
C25 C26 1.390(7) . ? 
C25 N3 1.412(6) 3_676 ? 
C26 C27 1.390(7) . ? 
C26 H26 0.9300 . ? 
C27 H27 0.9300 . ? 
C28 O1 1.188(6) . ? 
C28 O2 1.191(6) . ? 
C28 C29 1.434(7) . ? 
C29 C30 1.510(7) . ? 
C29 H29A 0.9700 . ? 
C29 H29B 0.9700 . ? 
C30 C29 1.510(7) 4 ? 
C30 H30A 0.9701 . ? 
C30 H30B 0.9701 . ? 
N1 Zn1 1.998(4) 2_665 ? 
N3 C25 1.412(6) 3_476 ? 
N4 Zn1 1.992(4) . ? 
N6 Zn1 2.000(4) . ? 
N8 O6 1.216(5) 3_566 ? 
N8 O6 1.216(5) . ? 
N8 O7 1.234(7) . ? 
N9 O5 1.132(10) . ? 
N9 O3 1.160(11) . ? 
N9 O4 1.206(10) . ? 
O1 Zn1 2.177(4) . ? 
O2 Zn1 2.214(4) . ? 
O1W H1X 0.8501 . ? 
O1W H1Y 0.8503 . ? 
O2W H2X 0.8499 . ? 
O2W H2Y 0.8499 . ? 
O3W H3X 0.8501 . ? 
O3W H3Y 0.8500 . ? 
Zn1 N1 1.998(4) 2_664 ? 
 
loop_ 
 _geom_angle_atom_site_label_1 
 _geom_angle_atom_site_label_2 
 _geom_angle_atom_site_label_3 
 _geom_angle 
 _geom_angle_site_symmetry_1 
 _geom_angle_site_symmetry_3 
 _geom_angle_publ_flag 
C2 C1 N1 109.0(4) . . ? 
C2 C1 H1 125.5 . . ? 
N1 C1 H1 125.5 . . ? 
C1 C2 N2 107.9(5) . . ? 
C1 C2 H2 126.1 . . ? 
N2 C2 H2 126.1 . . ? 
N1 C3 N2 112.4(5) . . ? 
N1 C3 H3 123.8 . . ? 
N2 C3 H3 123.8 . . ? 
C9 C4 C5 121.8(5) . . ? 
C9 C4 N2 119.0(5) . . ? 
C5 C4 N2 119.2(6) . . ? 
C6 C5 C4 118.5(6) . . ? 
C6 C5 H5 120.7 . . ? 
C4 C5 H5 120.7 . . ? 
C5 C6 C7 121.7(5) . . ? 
C5 C6 H6 119.2 . . ? 
C7 C6 H6 119.2 . . ? 
C6 C7 N3 123.0(4) . . ? 
C6 C7 C8 118.9(4) . . ? 
N3 C7 C8 118.1(4) . . ? 
C9 C8 C7 118.8(5) . . ? 
C9 C8 H8 120.6 . . ? 
C7 C8 H8 120.6 . . ? 
C4 C9 C8 120.2(5) . . ? 
C4 C9 H9 119.9 . . ? 
C8 C9 H9 119.9 . . ? 
N4 C10 N5 110.3(5) . . ? 
N4 C10 H10 124.9 . . ? 
N5 C10 H10 124.9 . . ? 
C12 C11 N4 108.7(5) . . ? 
C12 C11 H11 125.6 . . ? 
N4 C11 H11 125.6 . . ? 
N5 C12 C11 107.0(5) . . ? 
N5 C12 H12 126.5 . . ? 
C11 C12 H12 126.5 . . ? 
C14 C13 C18 120.0(4) . . ? 
C14 C13 N5 120.1(4) . . ? 
C18 C13 N5 119.9(4) . . ? 
C15 C14 C13 120.0(5) . . ? 
C15 C14 H14 120.0 . . ? 
C13 C14 H14 120.0 . . ? 
C14 C15 C16 120.0(5) . . ? 
C14 C15 H15 120.0 . . ? 
C16 C15 H15 120.0 . . ? 
C15 C16 C17 120.0(5) . . ? 
C15 C16 N3 119.6(4) . . ? 
C17 C16 N3 120.4(5) . . ? 
C18 C17 C16 120.0(5) . . ? 
C18 C17 H17 120.0 . . ? 
C16 C17 H17 120.0 . . ? 
C17 C18 C13 120.0(5) . . ? 
C17 C18 H18 120.0 . . ? 
C13 C18 H18 120.0 . . ? 
N6 C19 N7 109.9(5) . . ? 
N6 C19 H19 125.0 . . ? 
N7 C19 H19 125.0 . . ? 
C21 C20 N6 109.8(5) . . ? 
C21 C20 H20 125.1 . . ? 
N6 C20 H20 125.1 . . ? 
C20 C21 N7 106.3(5) . . ? 
C20 C21 H21 126.9 . . ? 
N7 C21 H21 126.9 . . ? 
C23 C22 C27 120.0(5) . . ? 
C23 C22 N7 120.0(5) . . ? 
C27 C22 N7 119.9(5) . . ? 
C22 C23 C24 120.0(5) . . ? 
C22 C23 H23 120.0 . . ? 
C24 C23 H23 120.0 . . ? 
C23 C24 C25 120.0(5) . . ? 
C23 C24 H24 120.0 . . ? 
C25 C24 H24 120.0 . . ? 
C26 C25 C24 120.0(5) . . ? 
C26 C25 N3 120.6(4) . 3_676 ? 
C24 C25 N3 119.3(4) . 3_676 ? 
C25 C26 C27 120.0(4) . . ? 
C25 C26 H26 120.0 . . ? 
C27 C26 H26 120.0 . . ? 
C26 C27 C22 120.0(5) . . ? 
C26 C27 H27 120.0 . . ? 
C22 C27 H27 120.0 . . ? 
O1 C28 O2 113.1(5) . . ? 
O1 C28 C29 118.0(5) . . ? 
O2 C28 C29 128.8(6) . . ? 
C28 C29 C30 116.0(5) . . ? 
C28 C29 H29A 108.3 . . ? 
C30 C29 H29A 108.3 . . ? 
C28 C29 H29B 108.3 . . ? 
C30 C29 H29B 108.3 . . ? 
H29A C29 H29B 107.4 . . ? 
C29 C30 C29 111.8(6) . 4 ? 
C29 C30 H30A 109.4 . . ? 
C29 C30 H30A 109.0 4 . ? 
C29 C30 H30B 109.0 . . ? 
C29 C30 H30B 109.4 4 . ? 
H30A C30 H30B 108.0 . . ? 
C3 N1 C1 104.6(4) . . ? 
C3 N1 Zn1 126.2(4) . 2_665 ? 
C1 N1 Zn1 128.9(3) . 2_665 ? 
C3 N2 C2 106.1(4) . . ? 
C3 N2 C4 125.3(5) . . ? 
C2 N2 C4 128.5(4) . . ? 
C7 N3 C16 118.2(4) . . ? 
C7 N3 C25 121.7(4) . 3_476 ? 
C16 N3 C25 119.6(4) . 3_476 ? 
C10 N4 C11 107.2(4) . . ? 
C10 N4 Zn1 125.5(4) . . ? 
C11 N4 Zn1 126.8(4) . . ? 
C12 N5 C10 106.8(4) . . ? 
C12 N5 C13 128.6(4) . . ? 
C10 N5 C13 124.5(4) . . ? 
C19 N6 C20 107.3(5) . . ? 
C19 N6 Zn1 128.2(4) . . ? 
C20 N6 Zn1 124.3(3) . . ? 
C19 N7 C21 106.7(4) . . ? 
C19 N7 C22 126.5(5) . . ? 
C21 N7 C22 126.8(5) . . ? 
O6 N8 O6 120.8(6) 3_566 . ? 
O6 N8 O7 119.6(3) 3_566 . ? 
O6 N8 O7 119.6(3) . . ? 
O5 N9 O3 120.4(9) . . ? 
O5 N9 O4 121.7(10) . . ? 
O3 N9 O4 117.9(9) . . ? 
C28 O1 Zn1 97.3(3) . . ? 
C28 O2 Zn1 95.3(3) . . ? 
H1X O1W H1Y 109.5 . . ? 
H2X O2W H2Y 109.5 . . ? 
H3X O3W H3Y 109.5 . . ? 
N4 Zn1 N1 105.96(17) . 2_664 ? 
N4 Zn1 N6 110.63(19) . . ? 
N1 Zn1 N6 103.16(19) 2_664 . ? 
N4 Zn1 O1 101.39(17) . . ? 
N1 Zn1 O1 140.71(17) 2_664 . ? 
N6 Zn1 O1 92.74(16) . . ? 
N4 Zn1 O2 101.02(17) . . ? 
N1 Zn1 O2 93.26(15) 2_664 . ? 
N6 Zn1 O2 138.17(17) . . ? 
O1 Zn1 O2 53.71(13) . . ? 
 
loop_ 
 _geom_torsion_atom_site_label_1 
 _geom_torsion_atom_site_label_2 
 _geom_torsion_atom_site_label_3 
 _geom_torsion_atom_site_label_4 
 _geom_torsion 
 _geom_torsion_site_symmetry_1 
 _geom_torsion_site_symmetry_2 
 _geom_torsion_site_symmetry_3 
 _geom_torsion_site_symmetry_4 
 _geom_torsion_publ_flag 
N1 C1 C2 N2 1.8(6) . . . . ? 
C9 C4 C5 C6 1.3(8) . . . . ? 
N2 C4 C5 C6 179.9(5) . . . . ? 
C4 C5 C6 C7 -2.0(8) . . . . ? 
C5 C6 C7 N3 -177.2(5) . . . . ? 
C5 C6 C7 C8 2.1(7) . . . . ? 
C6 C7 C8 C9 -1.3(7) . . . . ? 
N3 C7 C8 C9 178.0(4) . . . . ? 
C5 C4 C9 C8 -0.6(8) . . . . ? 
N2 C4 C9 C8 -179.2(5) . . . . ? 
C7 C8 C9 C4 0.6(8) . . . . ? 
N4 C11 C12 N5 -1.4(7) . . . . ? 
C18 C13 C14 C15 0.0(7) . . . . ? 
N5 C13 C14 C15 -178.4(4) . . . . ? 
C13 C14 C15 C16 0.0(7) . . . . ? 
C14 C15 C16 C17 0.0(8) . . . . ? 
C14 C15 C16 N3 178.5(4) . . . . ? 
C15 C16 C17 C18 0.0(8) . . . . ? 
N3 C16 C17 C18 -178.5(5) . . . . ? 
C16 C17 C18 C13 0.0(8) . . . . ? 
C14 C13 C18 C17 0.0(8) . . . . ? 
N5 C13 C18 C17 178.4(5) . . . . ? 
N6 C20 C21 N7 1.8(7) . . . . ? 
C27 C22 C23 C24 0.0(9) . . . . ? 
N7 C22 C23 C24 -175.6(6) . . . . ? 
C22 C23 C24 C25 0.0(9) . . . . ? 
C23 C24 C25 C26 0.0(9) . . . . ? 
C23 C24 C25 N3 176.4(5) . . . 3_676 ? 
C24 C25 C26 C27 0.0(8) . . . . ? 
N3 C25 C26 C27 -176.4(5) 3_676 . . . ? 
C25 C26 C27 C22 0.0(8) . . . . ? 
C23 C22 C27 C26 0.0(9) . . . . ? 
N7 C22 C27 C26 175.6(5) . . . . ? 
O1 C28 C29 C30 -164.0(5) . . . . ? 
O2 C28 C29 C30 20.5(10) . . . . ? 
C28 C29 C30 C29 167.9(6) . . . 4 ? 
N2 C3 N1 C1 1.2(6) . . . . ? 
N2 C3 N1 Zn1 -173.0(3) . . . 2_665 ? 
C2 C1 N1 C3 -1.9(6) . . . . ? 
C2 C1 N1 Zn1 172.1(4) . . . 2_665 ? 
N1 C3 N2 C2 -0.1(6) . . . . ? 
N1 C3 N2 C4 178.1(5) . . . . ? 
C1 C2 N2 C3 -1.1(6) . . . . ? 
C1 C2 N2 C4 -179.2(5) . . . . ? 
C9 C4 N2 C3 28.1(8) . . . . ? 
C5 C4 N2 C3 -150.6(5) . . . . ? 
C9 C4 N2 C2 -154.1(5) . . . . ? 
C5 C4 N2 C2 27.2(8) . . . . ? 
C6 C7 N3 C16 140.1(5) . . . . ? 
C8 C7 N3 C16 -39.1(7) . . . . ? 
C6 C7 N3 C25 -31.2(7) . . . 3_476 ? 
C8 C7 N3 C25 149.5(5) . . . 3_476 ? 
C15 C16 N3 C7 125.1(5) . . . . ? 
C17 C16 N3 C7 -56.5(7) . . . . ? 
C15 C16 N3 C25 -63.4(7) . . . 3_476 ? 
C17 C16 N3 C25 115.0(6) . . . 3_476 ? 
N5 C10 N4 C11 -1.1(6) . . . . ? 
N5 C10 N4 Zn1 171.5(3) . . . . ? 
C12 C11 N4 C10 1.6(7) . . . . ? 
C12 C11 N4 Zn1 -170.9(4) . . . . ? 
C11 C12 N5 C10 0.8(6) . . . . ? 
C11 C12 N5 C13 177.5(5) . . . . ? 
N4 C10 N5 C12 0.2(6) . . . . ? 
N4 C10 N5 C13 -176.7(5) . . . . ? 
C14 C13 N5 C12 -43.9(7) . . . . ? 
C18 C13 N5 C12 137.7(6) . . . . ? 
C14 C13 N5 C10 132.3(5) . . . . ? 
C18 C13 N5 C10 -46.1(7) . . . . ? 
N7 C19 N6 C20 1.0(7) . . . . ? 
N7 C19 N6 Zn1 -175.2(4) . . . . ? 
C21 C20 N6 C19 -1.8(7) . . . . ? 
C21 C20 N6 Zn1 174.6(4) . . . . ? 
N6 C19 N7 C21 0.1(7) . . . . ? 
N6 C19 N7 C22 -179.8(5) . . . . ? 
C20 C21 N7 C19 -1.2(6) . . . . ? 
C20 C21 N7 C22 178.7(6) . . . . ? 
C23 C22 N7 C19 138.6(6) . . . . ? 
C27 C22 N7 C19 -37.1(9) . . . . ? 
C23 C22 N7 C21 -41.4(9) . . . . ? 
C27 C22 N7 C21 143.0(6) . . . . ? 
O2 C28 O1 Zn1 -7.5(6) . . . . ? 
C29 C28 O1 Zn1 176.3(5) . . . . ? 
O1 C28 O2 Zn1 7.4(6) . . . . ? 
C29 C28 O2 Zn1 -177.0(7) . . . . ? 
C10 N4 Zn1 N1 126.4(5) . . . 2_664 ? 
C11 N4 Zn1 N1 -62.6(5) . . . 2_664 ? 
C10 N4 Zn1 N6 15.2(5) . . . . ? 
C11 N4 Zn1 N6 -173.7(5) . . . . ? 
C10 N4 Zn1 O1 -82.1(5) . . . . ? 
C11 N4 Zn1 O1 88.9(5) . . . . ? 
C10 N4 Zn1 O2 -137.0(5) . . . . ? 
C11 N4 Zn1 O2 34.1(5) . . . . ? 
C19 N6 Zn1 N4 -101.5(5) . . . . ? 
C20 N6 Zn1 N4 82.9(5) . . . . ? 
C19 N6 Zn1 N1 145.6(5) . . . 2_664 ? 
C20 N6 Zn1 N1 -30.0(5) . . . 2_664 ? 
C19 N6 Zn1 O1 1.8(5) . . . . ? 
C20 N6 Zn1 O1 -173.8(5) . . . . ? 
C19 N6 Zn1 O2 35.1(7) . . . . ? 
C20 N6 Zn1 O2 -140.4(4) . . . . ? 
C28 O1 Zn1 N4 -90.8(4) . . . . ? 
C28 O1 Zn1 N1 42.8(5) . . . 2_664 ? 
C28 O1 Zn1 N6 157.5(4) . . . . ? 
C28 O1 Zn1 O2 4.6(4) . . . . ? 
C28 O2 Zn1 N4 91.5(4) . . . . ? 
C28 O2 Zn1 N1 -161.5(4) . . . 2_664 ? 
C28 O2 Zn1 N6 -47.6(5) . . . . ? 
C28 O2 Zn1 O1 -4.6(4) . . . . ? 
 
_diffrn_measured_fraction_theta_max    0.999 
_diffrn_reflns_theta_full              26.00 
_diffrn_measured_fraction_theta_full   0.999 
_refine_diff_density_max    0.287 
_refine_diff_density_min   -0.780 
_refine_diff_density_rms    0.068 


# === END
